# Supplementary material
Source: publisher figshare collection journal article supplement (https://karger.figshare.com/articles/dataset/_/5311255)
Supplement: Supplementary file 2 [file 1]

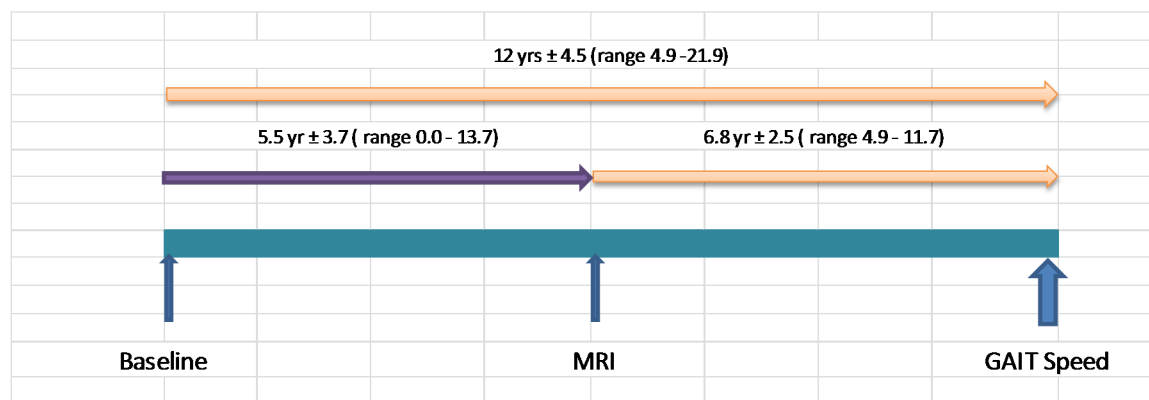

Baseline, n= 3298

MRI cohort, n = 1290 (including 199 house-hold members of participants in the MRI cohort who were not in the baseline NOMAS cohort)

Gait Speed cohort, n = 803

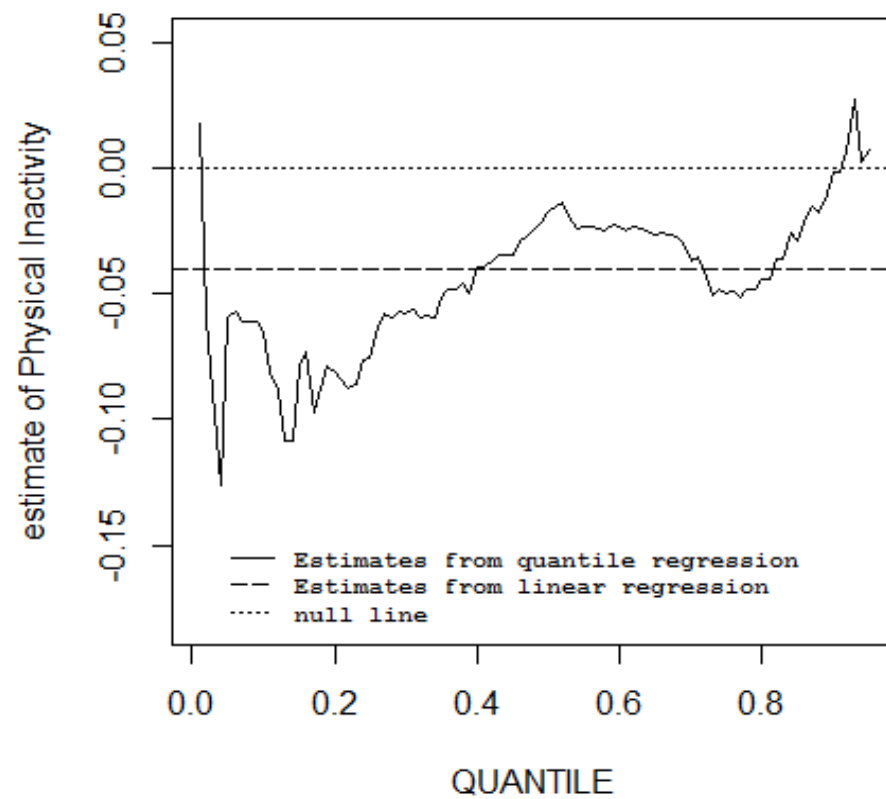

Figure 2 (online). Estimated parameter estimates using quantile regression for the association of physical inactivity with gait speed in the NOMAS cohort.
