# Supplementary material
Source: publisher figshare collection journal article supplement (https://karger.figshare.com/articles/dataset/_/5311255)
Supplement: Supplementary file 3 [file 1]

Archive with 2 entries (2 files):
- 479695_sm1.PDF
- 479695_sm2.PDF
